# Supplementary material for: Indium selenide for Q-switched pulse generation in a mid-infrared fiber laser
Source: Royal Society of Chemistry journal article supplement (doi:10.1039/d1tc00727k), 2021-01-01
Supplement: d1tc00727k1.pdf [file d1tc00727k1.pdf]

## Supporting information

### Indium selenide for Q-switched pulse generation in a mid-infrared fiber laser

Tenghui Chen,<sup>a</sup> Zhongjun Li,<sup>b</sup> Chunxiang Zhang,<sup>c</sup> Zhenhong Wang,<sup>a</sup> Mulin Luo,<sup>d</sup> Yuan Zhang,<sup>b</sup> Yachao Wang,<sup>b</sup> Quanlan Xiao,<sup>a</sup> Han Zhang,<sup>a</sup> Jun Liu<sup>a,\*</sup>

<sup>a</sup> Institute of Microscale optoelectronics, Shenzhen University, Shenzhen, 518060, China

<sup>b</sup> Department of Neurosurgery, Shenzhen Key Laboratory of Neurosurgery, the First Affiliated Hospital of Shenzhen University/Shenzhen Second People's Hospital, Shenzhen University, Shenzhen, 518035, China

<sup>c</sup> Center for Advanced Material Diagnostic Technology, College of Engineering Physics, Shenzhen Technology University, Shenzhen, 518118, China

<sup>d</sup> Hunan Key Laboratory for Micro-Nano Energy Materials and Devices, School of Physics and Optoelectronics, Xiangtan University, Xiangtan 411105, China

\*Corresponding author: E-mail: [liu-jun-1987@live.cn](mailto:liu-jun-1987@live.cn)

#### Property measurement of InSe

The morphologies and structural information of InSe nanosheets were characterized by a Transmission Electron Microscopy (JEM-F200, JEOL, Japan) at 200 kV as the accelerating voltage. The XRD data were collected using an X-ray powder diffractometer (D8 Discover, Bruker, Germany) equipped with Cu K $\alpha$  radiation ( $\lambda = 1.5406 \text{ \AA}$ ) and Jade software was used to identify the phase of the powder. For Raman spectrum of InSe nanosheets, 50  $\mu\text{L}$  solution was dropped onto a silicon substrate, following by configuration at a lower speed (500 rpm) for 10 s and then a higher speed (2500 rpm) for 3 minutes. Raman spectra were collected using a dispersive Raman microscope (InVia Reflex, Renishaw, UK) from 100 to 275  $\text{cm}^{-1}$ , excited by a laser with the wavelength of 514 nm and an objective lens (100 $\times$ , diameter of laser spot  $\sim 5 \mu\text{m}$ ). The concentration of InSe product in NMP was adjusted to 20  $\mu\text{g/mL}$  for absorption data collection by a UV-Vis-NIR spectrophotometer (Cary 60, Agilent Technologies, USA) in the range of 200-1000 nm. The AFM image was obtained by an atomic force microscopy (Dimension ICON system, Bruker). For optical properties measurement, InSe product was dropped onto a gold mirror and then dried in a vacuum oven at room temperature for 24 h.

## Experimental setup

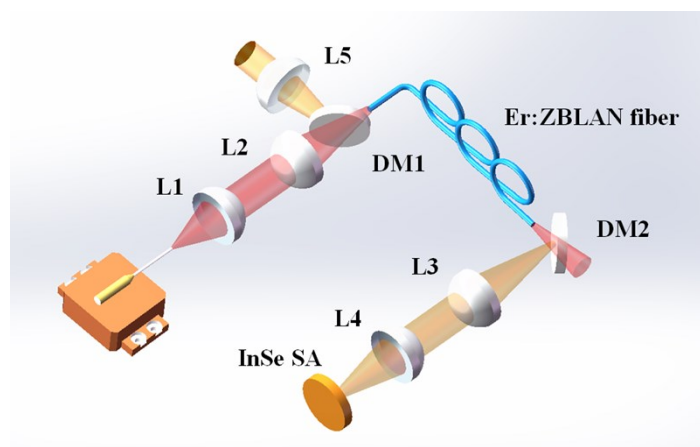

**Fig. S1** Diagrammatic scheme of the Q-switched laser.

Fig. S1 presents the experimental schematic of the InSe passively Q-switched Er-ZBLAN fiber laser. A commercial grating-narrowed 976 nm laser diode was used as the pump source, which has a maximum output power of 50W. The pump light was collimated by a plano-convex lens L1 ( $f=25.4$  mm, B-coated, N-BK7) and focused by L2 ( $f=50$  mm, B-coated, N-BK7). Through a dichroic mirror DM1 (high reflectivity at  $\sim 2.8$   $\mu\text{m}$ , high transmittance at  $\sim 976$  nm) positioned at an angle of  $45^\circ$ , also performing as the output coupler, the pump light was coupled into the inner-cladding of the double-clad Er-ZBLAN gain fiber with a doping concentration of 70000 ppm. The core diameter is 15  $\mu\text{m}$  and its numerical aperture (NA) is 0.12. The 1st cladding diameter is  $240 \times 260$   $\mu\text{m}$  and the 2nd one is 290  $\mu\text{m}$  (LE VERRE FLUORE, France). Another dichroic mirror DM2 was utilized to eliminate the residual pump and ensure the propagation of pure laser light during the cavity. An identical structure was constructed for the external cavity by the use of two 50-mm-focal-length plano-convex lenses (D-coated, CaF<sub>2</sub>), through which the laser light beam was focused onto the reflection-type InSe SA. The front-end fiber facet with a perpendicularly cleaved angle and the highly reflective mirror integrated with the InSe SA provided the lasing feedback and the other opposite fiber facet was angle-cleaved at  $8^\circ$  to reduce the adverse effect of the parasitic oscillation formed by the two fiber end facets. Finally, the output light was collimated by the lens L5 ( $f=30$ mm, D-coated, CaF<sub>2</sub>).

The laser output spectrum was recorded by an optical spectrum analyzer (OSA207C, Thorlabs) and the radio-frequency (RF) spectrum was monitored by a RF spectrum analyzer (GA4064, Gratten). The temporal characteristics of the output pulses were evaluated by a real-time oscilloscope (MDO4104C, Tektronix) and an infrared photoconductive detector (PCI-2TE-12, VIGO System).
